# Supplementary material
Source: publisher figshare collection journal article supplement (https://rs.figshare.com/ndownloader/files/14651333)
Supplement: Supplementary file 1 [file 14651333]

**Joint attention skills in wild Arabian babblers (*Turdoides squamiceps*):**

**A consequence of cooperative breeding?**

Yitzchak Ben Mocha<sup>1,2,3</sup>, Roger Mundry<sup>4</sup> and Simone Pika<sup>2,5</sup>

<sup>1</sup>Research Group “Evolution of Communication”, Max Planck Institute for Ornithology, Germany

<sup>2</sup>Max Planck Institute for Evolutionary Anthropology, Department of Primatology, Germany

<sup>3</sup>Centre for the Advanced Study of Collective Behaviour, University of Konstanz, Konstanz, Germany

<sup>4</sup>Max Planck Institute for Evolutionary Anthropology, Germany

<sup>5</sup>University of Osnabrück, Institute of Cognitive Science, Comparative BioCognition, Germany

**Table S1.** Inter-observer reliability tests.

| Criterion                                                                                  | Signal                 | Reliability measure<br>(Cohen's Kappa/<br>Spearman's rank<br>correlation coefficient) | Number of<br>episodes<br>tested | P value | Statistical test               |
|--------------------------------------------------------------------------------------------|------------------------|---------------------------------------------------------------------------------------|---------------------------------|---------|--------------------------------|
| Sensitivity to the<br>attentional state of<br>the recipient                                | BABBLER<br>WALK        | K=0.86                                                                                | 17                              | <0.005  | Unweighted<br>Cohen's Kappa    |
| Duration of<br>signalling<br>behaviour*                                                    | BABBLER<br>WALK        | $r_s = 0.93$                                                                          | 23                              | <0.001  | Spearman's rank<br>correlation |
| Persistence of<br>signalling                                                               | BABBLER<br>WALK        | K=0.93                                                                                | 22                              | <0.001  | Unweighted<br>Cohen's Kappa    |
| Elaboration of<br>signal                                                                   | BABBLER<br>WALK        | K =1.00                                                                               | 22                              | <0.001  | Unweighted<br>Cohen's Kappa    |
| Presence of a<br>voluntary<br>response                                                     | BABBLER<br>WALK        | K =1.00                                                                               | 23                              | <0.005  | Unweighted<br>Cohen's Kappa    |
| Recipient's<br>response type                                                               | BABBLER<br>WALK        | K =0.80                                                                               | 23                              | <0.001  | Unweighted<br>Cohen's Kappa    |
| Gaze alternation<br>(yes/no)                                                               | OBJECT<br>PRESENTATION | K =1.00                                                                               | 14                              | <0.001  | Unweighted<br>Cohen's Kappa    |
|                                                                                            | BABBLER<br>WALK        | K =1.00                                                                               | 22                              | <0.001  |                                |
| Signaller's post<br>gaze alternation<br>behaviour                                          | OBJECT<br>PRESENTATION | K =1.00                                                                               | 14                              | <0.001  | Unweighted<br>Cohen's Kappa    |
|                                                                                            | BABBLER<br>WALK        | K =1.00                                                                               | 22                              | <0.001  |                                |
| Duration of<br>coordinated joint<br>engagement<br>between<br>interlocutors <sup>*,**</sup> | OBJECT<br>PRESENTATION | $r_s = 0.92$                                                                          | 14                              | <0.001  | Spearman's rank<br>correlation |
|                                                                                            | BABBLER<br>WALK        | $r_s = 0.86$                                                                          | 17                              | <0.001  |                                |

\* Duration measurements of signalling behaviour and coordinated joint engagements were extracted from video recordings with an accuracy of within one second. Since some recordings started several seconds after the beginning of signalling behaviour, reported durations are occasionally underestimates.

---

\*\* Note that our definition for coordinated joint engagement is a rigorous modification of the original criterion [1,2], which only captured the duration of signalling behaviour regardless of whether the recipient responded or not.

---

1. Carpenter, M., Nagell, K. & Tomasello, M. 1998 Social cognition, joint attention and communicative competence from 9 to 15 months of age. *Monogr. Soc. Res. Child Dev.* **63**.
2. Bakeman, R. & Adamson, L. B. 1984 Coordinating attention to people and objects in mother-infant and peer-infant interaction. *Child Dev.* **55**, 1278–1289. (doi:10.2307/1129997)

---

**Table S2.** Random slopes included in LMMs and GLMMs.

---

|                                  | OBJECT PRESENTATION                                                | BABBLER WALK                                            |
|----------------------------------|--------------------------------------------------------------------|---------------------------------------------------------|
| Persistence of signalling        |                                                                    | Random slopes were not included                         |
| Elaboration of signal            |                                                                    | Random slopes were not included                         |
| Duration of signalling behaviour |                                                                    | Recipient's behaviour within signaller and social group |
| Responses to signals             |                                                                    | Condition within response type                          |
| Co-orientation of attentions     | Recipient's behaviour within signaller, social group and recipient | Recipient's behaviour within social group and recipient |

---

---

**Table S3.** The use of BABBLER WALK toward adult conspecifics.

---

|            |                                                                                                                                                                                                                                                                                                                                                                                                                                                                                                                                                                                                                                                   |
|------------|---------------------------------------------------------------------------------------------------------------------------------------------------------------------------------------------------------------------------------------------------------------------------------------------------------------------------------------------------------------------------------------------------------------------------------------------------------------------------------------------------------------------------------------------------------------------------------------------------------------------------------------------------|
| 28.03.2012 | A male from one social group performed BABBLER WALK towards a female of a neighbouring group and tried to lead her into his group's territory. She did not follow him. The male and the female were brother and sister, formally members of the same social group.                                                                                                                                                                                                                                                                                                                                                                                |
| 20.02.2014 | This is the end of the day in which the female laid the last egg out of four. The group flew to its roosting tree at dark. The female stopped and flew back to the nesting tree in order to incubate the eggs for the first time. A subordinate male followed after her and stayed with her at the nesting tree for a minute. Then both of them flew back toward the group. The female stopped in the middle of the way and the male performed BABBLER WALK and tried to lead her to the rest of the group. After several attempts she followed him to the roosting tree. But a few minutes later she returned to the nest and slept there alone. |
| 27.03.2014 | An alpha male of one group performed BABBLER WALK toward a female of a neighbouring group and tried to lead her into his group's territory. She did not follow him.                                                                                                                                                                                                                                                                                                                                                                                                                                                                               |

---

**Table S4.** Mean results of 1000 Generalized Linear Mixed Models examining the effect of the recipient's behaviour (cooperative/ uncooperative) on the probability of the signaller to persist with signalling behaviour (n=112 episodes per model).

| Term                    | Estimate | SE     | $\chi^2$ | d.f | p     |
|-------------------------|----------|--------|----------|-----|-------|
| Intercept               | 14.78    | 6.221  |          |     |       |
| Recipient (cooperative) | -26.687  | 27.075 | -3       | 1   | 0.046 |

Footnote: the large absolute estimates arose from data close to causing complete separation, the response to in part vary only little within the levels of the random effects.

**Table S5.** Mean results of 1000 Generalized Linear Mixed Models examining the effect of the recipient's behaviour (cooperative/ uncooperative) on the probability of the signaller to elaborate its signalling behaviour (n=100 episodes per model).

| Term                    | Estimate | SE    | $\chi^2$ | d.f | p     |
|-------------------------|----------|-------|----------|-----|-------|
| Intercept               | 1.755    | 1.301 |          |     |       |
| Recipient (cooperative) | -6.383   | 3.940 | -3.17    | 1   | 0.013 |

Footnote: the large absolute estimates arose from data close to causing complete separation, the response to in part vary only little within the levels of the random effects.

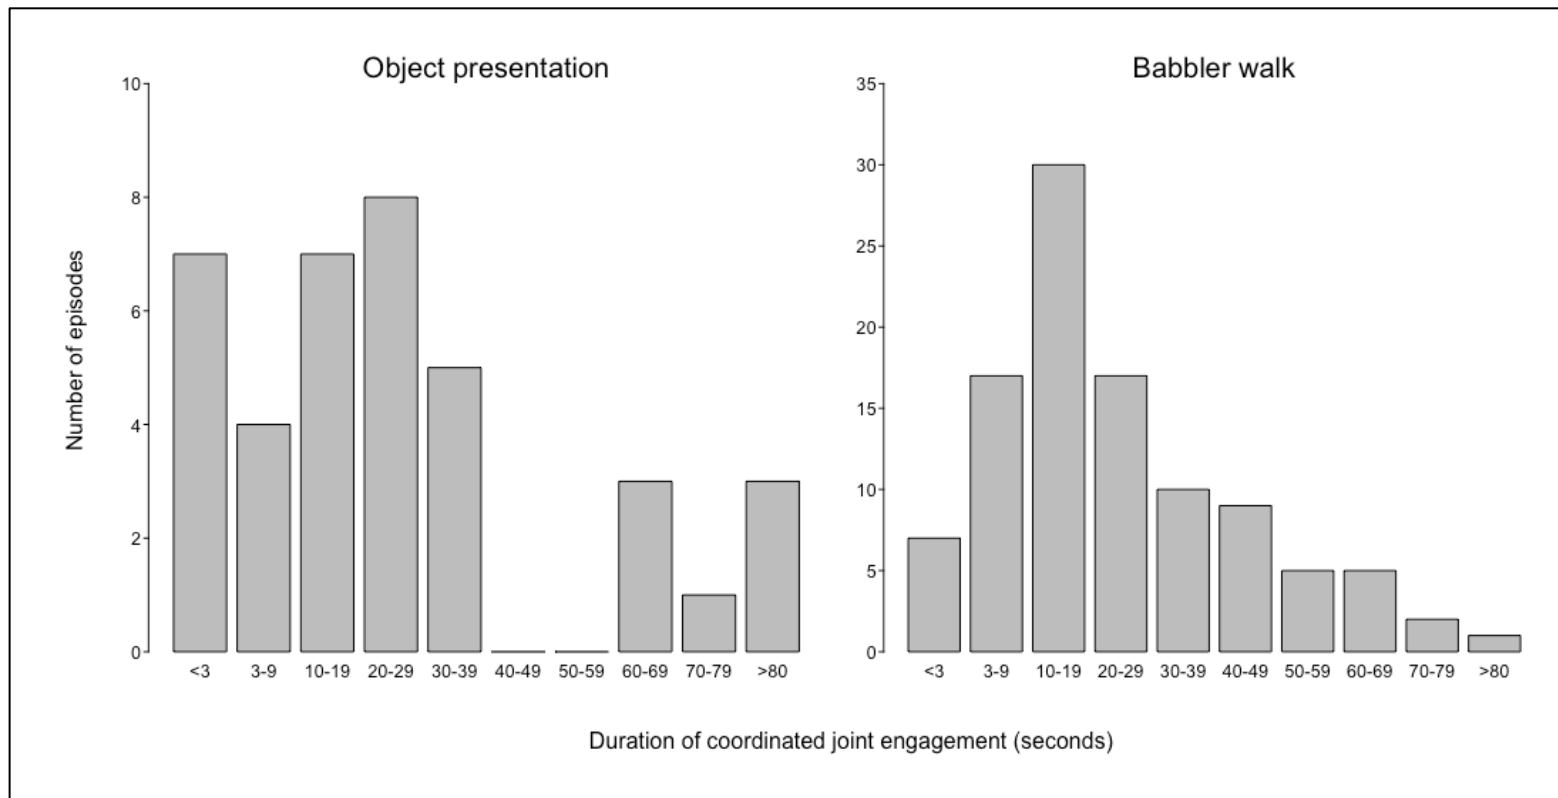

**Figure S1. Duration of coordinated joint engagement following a voluntarily response to a signal.**

Number of episodes of coordinated joint travel according to their duration (in seconds) after a voluntary response to OBJECT PRESENTATION (n=38) and BABBLER WALK (n=103) signals.
